# Supplementary material
Source: Springer Nature journal article supplement (https://www.springermedizin.de/resource/supplementary/12993_2009_216_MOESM6_ESM.pdf/9617310)

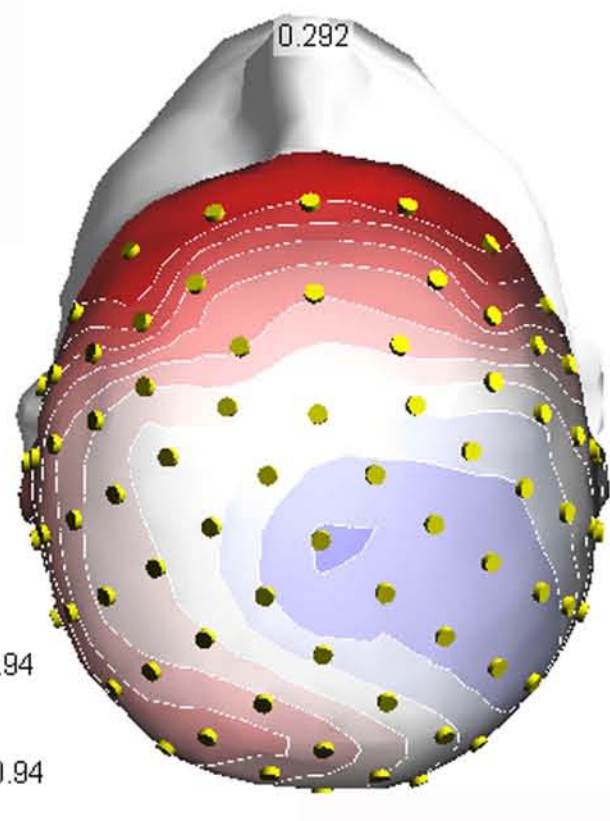

Motor N2

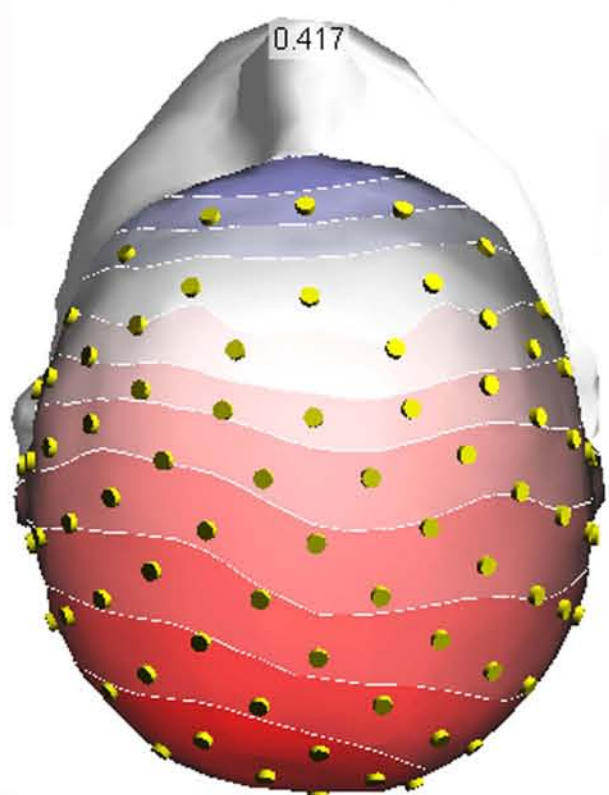

NP400

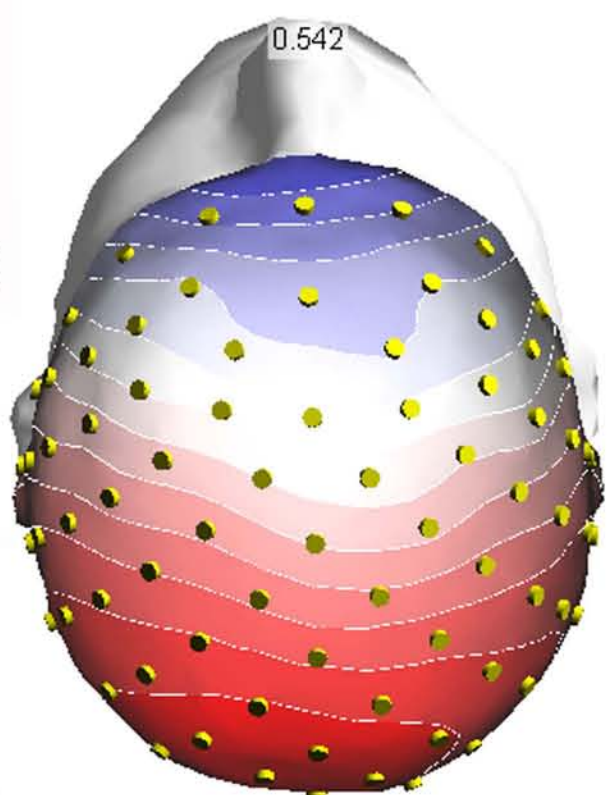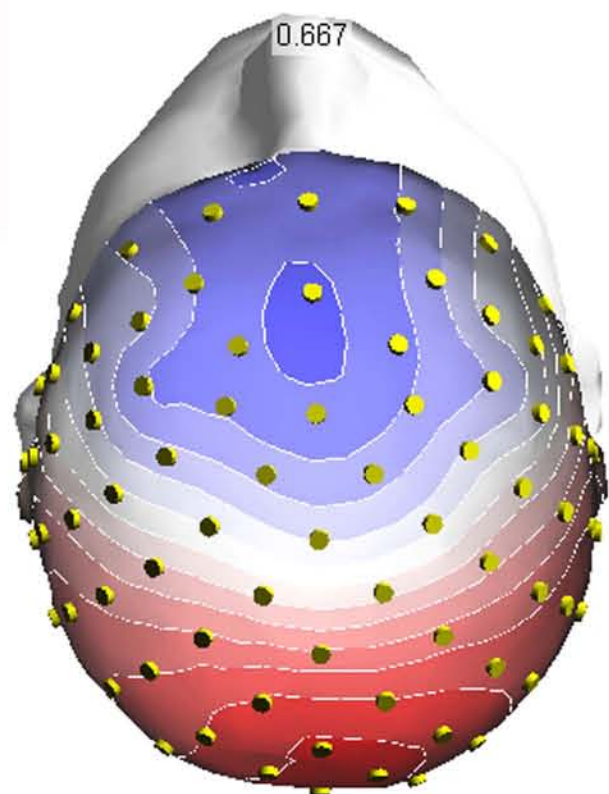

NP600

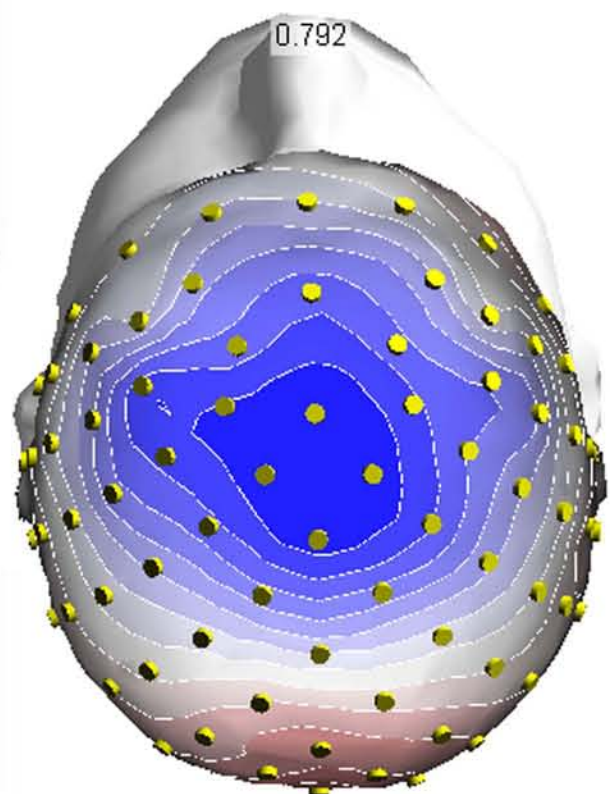

Supplement: MOESM6 [file 9617310]
